# Supplementary material for: The phased telomere-to-telomere reference genome of Musa acuminata, a main contributor to banana cultivars
Source: PubMed Central journal article supplement (PMC10505225; doi:10.1038/s41597-023-02546-9), 2023-09-16
Supplement: 41597_2023_2546_MOESM1_ESM.pdf [file 41597_2023_2546_MOESM1_ESM.pdf]

## Supplementary information for:

The phased telomere-to-telomere reference genome of *Musa acuminata*, a main contributor to banana cultivars

Xin Liu, Rida Arshad, Xu Wang, Wei-Ming Li, Yongfeng Zhou, Xue-Jun Ge, Hui-Run Huang

| Supplementary | Title                                                                                                                                     | Pages |
|---------------|-------------------------------------------------------------------------------------------------------------------------------------------|-------|
| Figure S1     | The Hi-C heatmap of the unphased MA reference genome.                                                                                     | 2     |
| Figure S2     | The consensus quality values (QV) of MAH1 and MAH2.                                                                                       | 3     |
| Figure S3     | The potential centromeric regions of <i>Musa acuminata</i> ssp. <i>malaccensis</i> based on the density of the 183bp tandem repeat units. | 4     |
| Figure S4     | The Mummerplot of MAH1, MAH2 and MAV4.                                                                                                    | 5     |
| Figure S5     | The structural variants between MAH1, MAH2 and MAV4.                                                                                      | 6     |
| Table S1      | Statistics of repeats content in MAH1 and MAH2.                                                                                           | 7-8   |
| Table S2      | Summary of different repeat units on centromeres in all chromosomes.                                                                      | 9     |
| Table S3      | The GO enrichment results of the genes located in the 3-Mb translocated region (34,734,628 - 37,827,340 bp of chromosome 04) in MAH1.     | 10-12 |

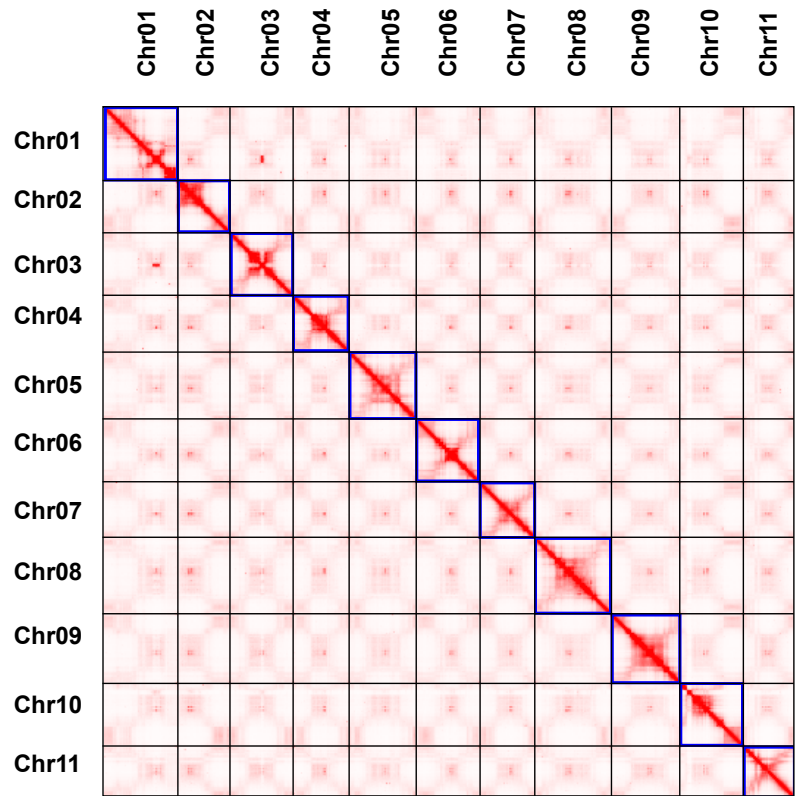

**Supplementary Figure S1.** The Hi-C heatmap of the unphased MA reference genome.

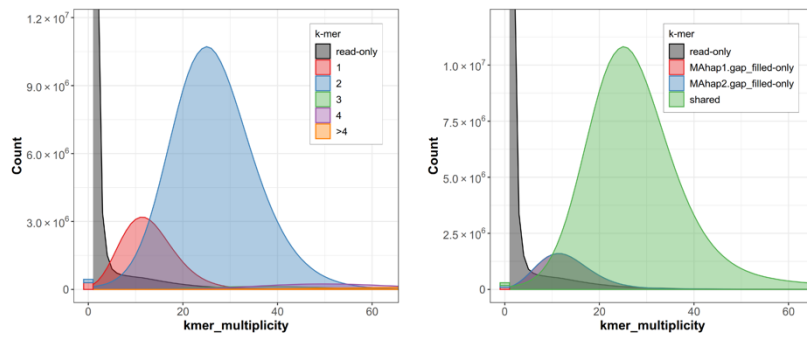

**Supplementary Figure S2.** The consensus quality values (QV) of MAH1 and MAH2.

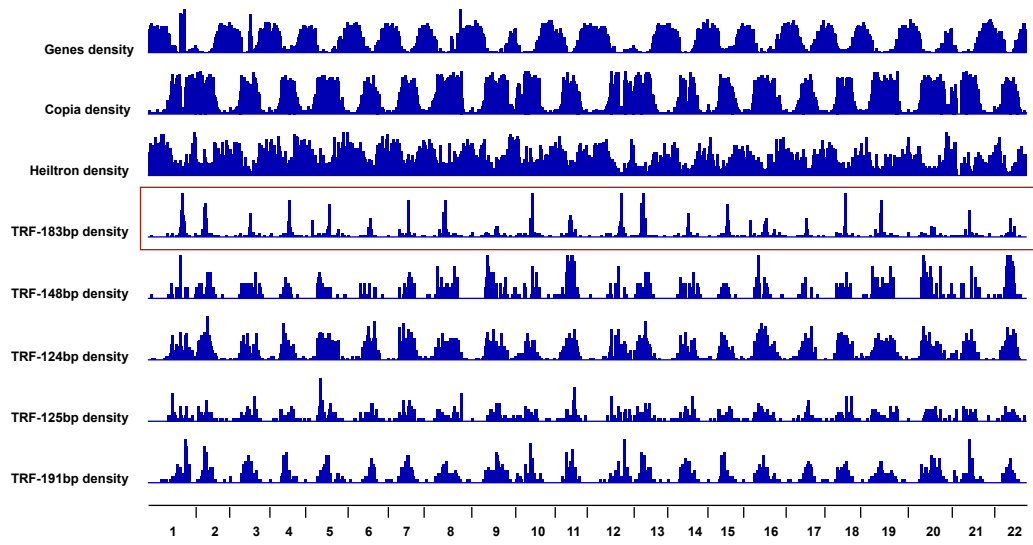

**Supplementary Figure S3.** The potential centromeric regions of *Musa acuminata* ssp. *malaccensis* based on the density of the 183bp tandem repeat units.

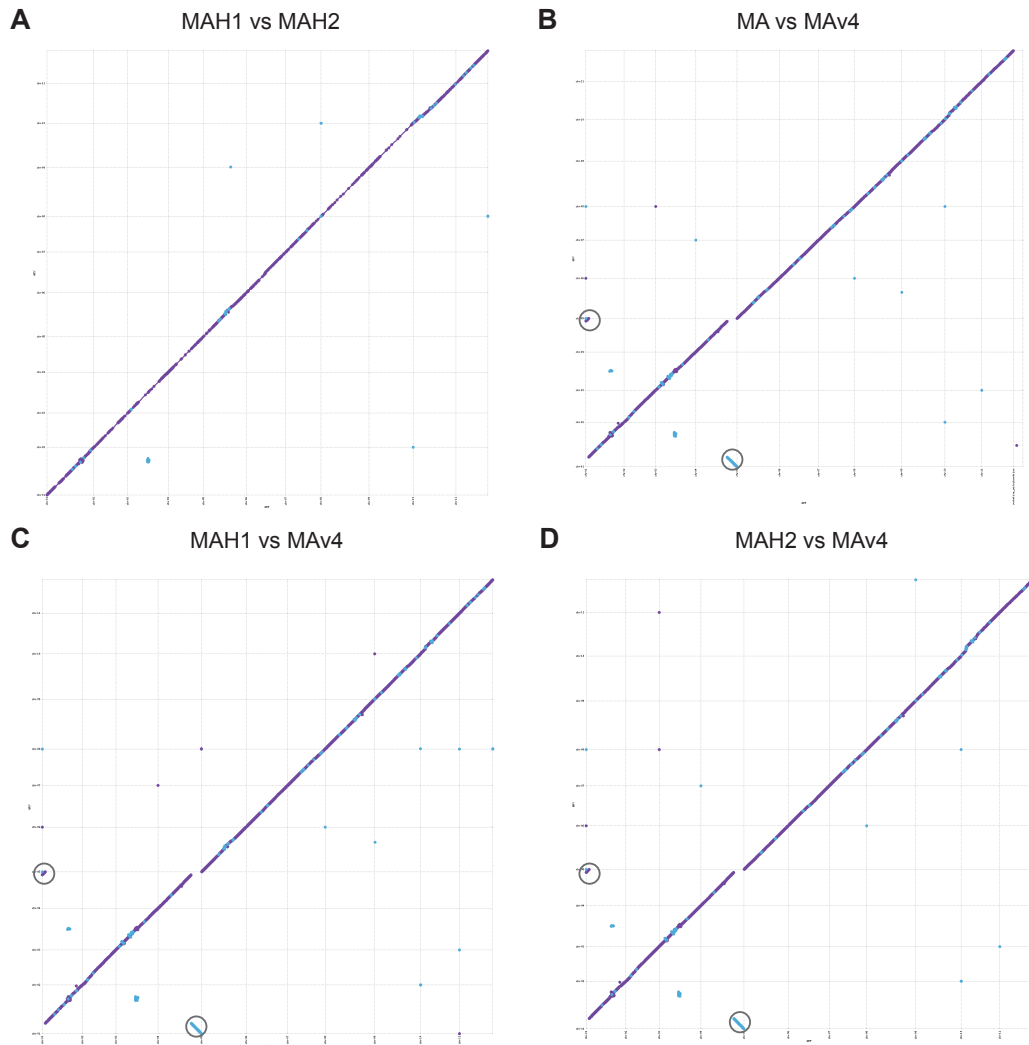

**Supplementary Figure S4.** The Mummerplot of MAH1, MAH2 and MAV4. The phased subgenomes show high consistency (A), while a translocation was shown in chromosome 01 and chromosome 04 between our phased or unphased genomes and MAV4 (B, C and D).

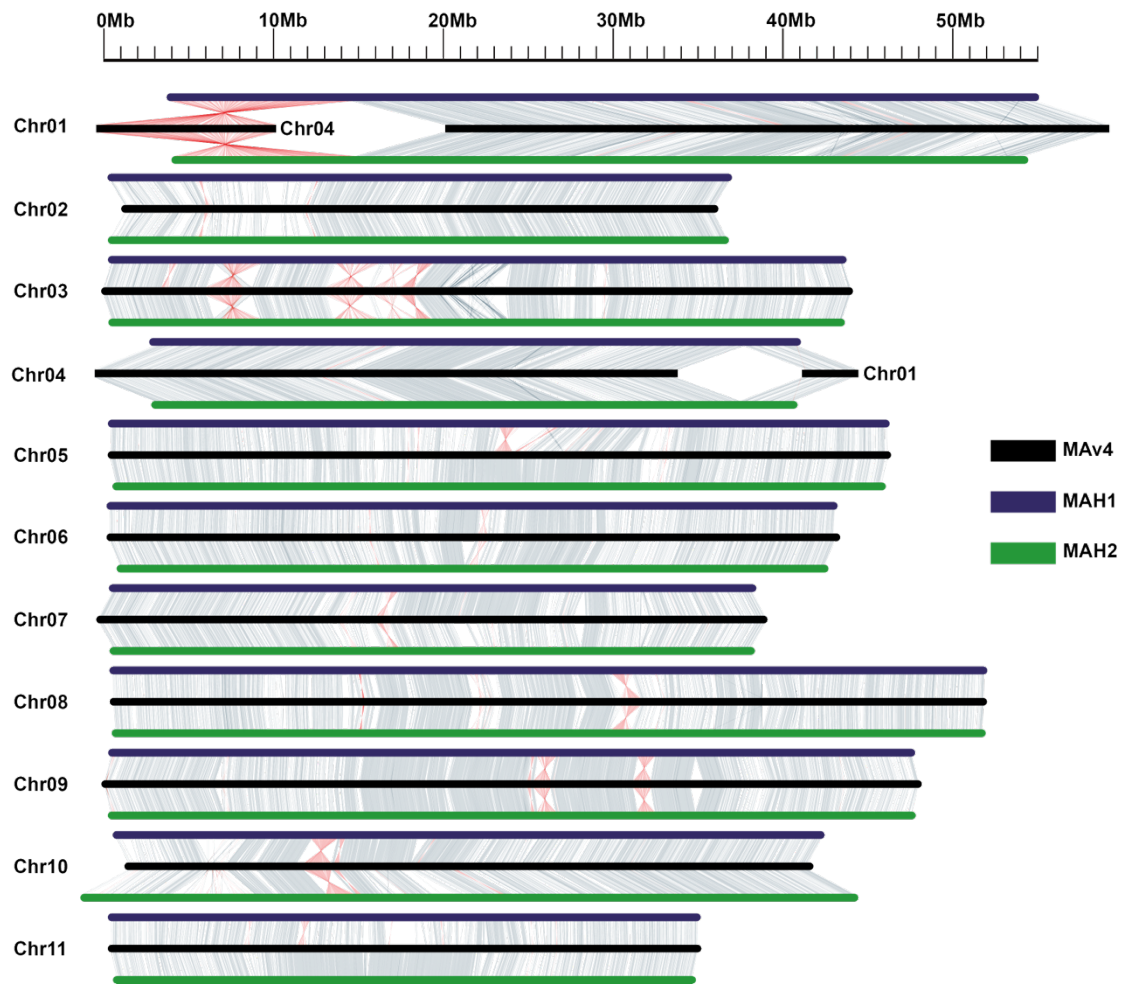

**Supplementary Figure S5.** The structural variants between MAH1, MAH2 and MAV4.

**Supplementary Table S1. Statistics of repeats content in MAH1 and MAH2**

| Genome name:        | MAH1                  |                 |                |
|---------------------|-----------------------|-----------------|----------------|
| Chromosomes number: | 11                    |                 |                |
| Total length (bp):  | 469843875             |                 |                |
| GC level:           | 0.3912                |                 |                |
| Bases masked:       | 235459590 bp (50.11%) |                 |                |
| <b>Class</b>        | <b>Count</b>          | <b>bpMasked</b> | <b>%masked</b> |
| LTR                 | --                    | --              | --             |
| Copia               | 142871                | 143678256       | 30.58%         |
| Gypsy               | 47959                 | 28308096        | 6.03%          |
| unknown             | 47075                 | 24396053        | 5.19%          |
| TIR                 | --                    | --              | --             |
| CACTA               | 5285                  | 1636100         | 0.35%          |
| Mutator             | 43580                 | 20588170        | 4.38%          |
| PIF_Harbinger       | 1459                  | 567348          | 0.12%          |
| Tc1_Mariner         | 1755                  | 387440          | 0.08%          |
| hAT                 | 10731                 | 4084895         | 0.87%          |
| nonLTR              | --                    | --              | --             |
| LINE_element        | 255                   | 112054          | 0.02%          |
| nonTIR              | --                    | --              | --             |
| helitron            | 10060                 | 3190605         | 0.68%          |
| repeat_region       | 25438                 | 8510573         | 1.81%          |
| Total               | 336468                | 235459590       | 50.11%         |

Genome name: MAH2  
 Chromosomes number: 11  
 Total length (bp): 470199455  
 GC level: 0.392  
 Bases masked : 234610719 bp (49.90 %)

| <b>Class</b>  | <b>Count</b> | <b>bpMasked</b> | <b>%masked</b> |
|---------------|--------------|-----------------|----------------|
| LTR           | --           | --              | --             |
| Copia         | 137921       | 131788092       | 28.03%         |
| Gypsy         | 36843        | 28984780        | 6.16%          |
| unknown       | 60198        | 25579893        | 5.44%          |
| TIR           | --           | --              | --             |
| CACTA         | 8332         | 2653785         | 0.56%          |
| Mutator       | 35418        | 26069401        | 5.54%          |
| PIF_Harbinger | 1196         | 445937          | 0.09%          |
| Tc1_Mariner   | 1184         | 299030          | 0.06%          |
| hAT           | 11681        | 4358177         | 0.93%          |
| nonLTR        | --           | --              | --             |
| LINE_element  | 2378         | 1640147         | 0.35%          |
| nonTIR        | --           | --              | --             |
| helitron      | 7952         | 2532993         | 0.54%          |
| repeat_region | 27089        | 10258484        | 2.18%          |
| Total         | 330192       | 234610719       | 49.90%         |

Note: The information above is the default output of EDTA with parameters - species others s -step all -evaluate 1 -sensitive 1 -anno



**Supplementary Table S2. Summary of different repeat units on centromeres in all chromosomes.**

| chr01 |        | chr02 |        | chr03 |        | chr04 |        |
|-------|--------|-------|--------|-------|--------|-------|--------|
| units | copies | units | copies | units | copies | units | copies |
| 469   | 6220   | 124   | 402    | 469   | 4015   | 124   | 300.1  |
| 124   | 403    | 183   | 148    | 124   | 314.4  | 183   | 105.9  |
| 471   | 166    | 191   | 136    | 191   | 160.2  | 117   | 102    |
| 183   | 163    | 125   | 112    | 120   | 99.8   | 191   | 99.8   |
| 191   | 163    | 134   | 102    | 125   | 97.2   | 125   | 84.8   |
| chr05 |        | chr06 |        | chr07 |        | chr08 |        |
| units | copies | units | copies | units | copies | units | copies |
| 124   | 473    | 124   | 392    | 124   | 422.3  | 124   | 547.5  |
| 125   | 161    | 125   | 112    | 191   | 147.9  | 427   | 498.5  |
| 191   | 145    | 191   | 94.4   | 125   | 115.9  | 405   | 359.7  |
| 183   | 139    | 186   | 87.9   | 183   | 96     | 191   | 158.8  |
| 120   | 90.4   | 151   | 82.3   | 107   | 60.9   | 125   | 136.2  |
| chr09 |        | chr10 |        | chr11 |        | chr12 |        |
| units | copies | units | copies | units | copies | units | copies |
| 124   | 461    | 220   | 4006   | 124   | 369.8  | 469   | 6966   |
| 191   | 206    | 124   | 336    | 148   | 145.9  | 124   | 359.8  |
| 148   | 155    | 191   | 153    | 191   | 127.6  | 471   | 236.8  |
| 125   | 127    | 183   | 143    | 125   | 122.8  | 191   | 152.8  |
| 120   | 98     | 109   | 122    | 183   | 102.5  | 183   | 145.5  |
| chr13 |        | chr14 |        | chr15 |        | chr16 |        |
| units | copies | units | copies | units | copies | units | copies |
| 124   | 406    | 469   | 3966   | 124   | 296    | 124   | 501.3  |
| 183   | 150    | 124   | 317    | 183   | 101.9  | 125   | 144    |
| 191   | 136    | 191   | 158    | 191   | 99.8   | 183   | 138.3  |
| 125   | 116    | 120   | 105    | 117   | 97.9   | 191   | 129.3  |
| 134   | 100    | 125   | 97.2   | 125   | 86.8   | 105   | 89.7   |
| chr17 |        | chr18 |        | chr19 |        | chr20 |        |
| units | copies | units | copies | units | copies | units | copies |
| 124   | 366    | 124   | 419    | 124   | 555.6  | 124   | 455    |
| 191   | 97.7   | 191   | 128    | 405   | 359.7  | 191   | 205.8  |
| 151   | 85     | 125   | 112    | 427   | 346.5  | 148   | 157.1  |
| 125   | 84.5   | 183   | 99.3   | 191   | 164.8  | 125   | 125.1  |
| 186   | 80.7   | 148   | 62.5   | 125   | 136.5  | 120   | 95.7   |
| chr21 |        | chr22 |        |       |        |       |        |
| units | copies | units | copies |       |        |       |        |
| 220   | 6472   | 124   | 370    |       |        |       |        |
| 124   | 402    | 148   | 146    |       |        |       |        |
| 191   | 183    | 191   | 94.1   |       |        |       |        |
| 109   | 155    | 125   | 90.4   |       |        |       |        |
| 183   | 108    | 105   | 68.2   |       |        |       |        |

**Supplementary Table S3. The GO enrichment results of the genes located in the 3-Mb translocated region (34,734,628 - 37,827,340 bp of chromosome 04) in MAH1.** MF, Molecular function; CC, Cellular component;BP, Biological process.

| Class | GO_Name                                                       | GO_ID      | GO_Level | P_value    | EnrichmentScore |
|-------|---------------------------------------------------------------|------------|----------|------------|-----------------|
| MF    | transporter activity                                          | GO:0005215 | 2        | 0.00639684 | 1.80773097      |
| MF    | monoatomic anion transmembrane transporter activity           | GO:0008509 | 5        | 0.007944   | 2.79423559      |
| MF    | monoatomic ion transmembrane transporter activity             | GO:0015075 | 4        | 0.01098306 | 2.04073386      |
| MF    | transmembrane transporter activity                            | GO:0022857 | 3        | 0.01175789 | 1.77277787      |
| MF    | organic anion transmembrane transporter activity              | GO:0008514 | 4        | 0.01355187 | 3.0721962       |
| MF    | monoatomic cation transmembrane transporter activity          | GO:0008324 | 5        | 0.01628308 | 2.30414715      |
| MF    | inorganic molecular entity transmembrane transporter activity | GO:0015318 | 4        | 0.0238958  | 1.89899506      |
| MF    | inorganic cation transmembrane transporter activity           | GO:0022890 | 5        | 0.03115188 | 2.17329435      |
| CC    | obsolete intrinsic component of membrane                      | GO:0031224 | 0        | 2.50E-04   | 2.31670098      |
| CC    | nuclear body                                                  | GO:0016604 | 3        | 0.0015778  | 4.12173794      |
| CC    | obsolete extracellular region part                            | GO:0044421 | 0        | 0.00423464 | 4.7047849       |
| CC    | chloroplast                                                   | GO:0009507 | 7        | 0.00470173 | 1.55392324      |
| CC    | plastid                                                       | GO:0009536 | 6        | 0.0052209  | 1.53039472      |
| CC    | nuclear speck                                                 | GO:0016607 | 4        | 0.00701182 | 4.17293965      |
| CC    | chloroplast membrane                                          | GO:0031969 | 6        | 0.0105267  | 3.77864614      |
| CC    | plastid membrane                                              | GO:0042170 | 5        | 0.01340196 | 2.25829675      |
| CC    | organelle membrane                                            | GO:0031090 | 4        | 0.01507675 | 1.49965019      |
| CC    | obsolete membrane part                                        | GO:0044425 | 0        | 0.01664485 | 1.55002603      |
| CC    | thylakoid                                                     | GO:0009579 | 6        | 0.02380688 | 2.05960541      |
| CC    | microbody                                                     | GO:0042579 | 6        | 0.02402427 | 2.7035947       |
| CC    | peroxisome                                                    | GO:0005777 | 7        | 0.02402427 | 2.7035947       |

|    |                                                   |            |   |            |            |
|----|---------------------------------------------------|------------|---|------------|------------|
| CC | bounding membrane of organelle                    | GO:0098588 | 5 | 0.02701417 | 1.55519279 |
| CC | plastid envelope                                  | GO:0009526 | 5 | 0.02771339 | 1.7610571  |
| CC | chloroplast envelope                              | GO:0009941 | 6 | 0.03934272 | 1.82340886 |
| CC | chloroplast thylakoid                             | GO:0009534 | 8 | 0.04408488 | 2.03127221 |
| CC | obsolete chloroplast part                         | GO:0044434 | 0 | 0.04510026 | 1.50958164 |
| CC | plastid thylakoid                                 | GO:0031976 | 7 | 0.04523039 | 2.0205813  |
| CC | vacuolar membrane                                 | GO:0005774 | 6 | 0.04633399 | 1.77437602 |
| CC | plant-type vacuole                                | GO:0000325 | 7 | 0.04679628 | 2.55259606 |
| CC | obsolete cytoplasmic part                         | GO:0044444 | 0 | 0.04947538 | 1.13796475 |
| BP | anther development                                | GO:0048653 | 4 | 0.00383367 | 4.8162963  |
| BP | organonitrogen compound catabolic process         | GO:1901565 | 5 | 0.00453555 | 2.0659716  |
| BP | protein catabolic process                         | GO:0030163 | 6 | 0.00588219 | 2.13718378 |
| BP | monoatomic anion transmembrane transport          | GO:0098656 | 7 | 0.0060345  | 2.71765935 |
| BP | photosynthesis                                    | GO:0015979 | 4 | 0.00626139 | 3.6349406  |
| BP | post-embryonic development                        | GO:0009791 | 3 | 0.01672247 | 1.45055512 |
| BP | monoatomic anion transport                        | GO:0006820 | 6 | 0.01728145 | 2.28742304 |
| BP | organic substance catabolic process               | GO:1901575 | 4 | 0.02028085 | 1.60161872 |
| BP | monoatomic ion transmembrane transport            | GO:0034220 | 6 | 0.02036939 | 1.83477954 |
| BP | cellular response to chemical stress              | GO:0062197 | 5 | 0.02135026 | 2.77863248 |
| BP | stamen development                                | GO:0048443 | 6 | 0.02810038 | 2.93676603 |
| BP | androecium development                            | GO:0048466 | 5 | 0.02810038 | 2.93676603 |
| BP | regulation of flower development                  | GO:0009909 | 7 | 0.02823929 | 2.6034034  |
| BP | proteolysis involved in protein catabolic process | GO:0051603 | 7 | 0.02864777 | 1.91953838 |
| BP | monoatomic cation transmembrane transport         | GO:0098655 | 7 | 0.03258005 | 2.04465409 |
| BP | transmembrane transport                           | GO:0055085 | 5 | 0.0329954  | 1.5656053  |

|    |                                    |            |   |            |            |
|----|------------------------------------|------------|---|------------|------------|
| BP | catabolic process                  | GO:0009056 | 3 | 0.03474745 | 1.49658924 |
| BP | floral whorl development           | GO:0048438 | 4 | 0.03977634 | 2.21075896 |
| BP | post-embryonic plant morphogenesis | GO:0090698 | 4 | 0.04113594 | 2.06044761 |
| BP | macromolecule catabolic process    | GO:0009057 | 5 | 0.04141326 | 1.6308001  |
| BP | organic anion transport            | GO:0015711 | 6 | 0.04535028 | 2.32110665 |
| BP | seedling development               | GO:0090351 | 4 | 0.0483355  | 2.28440931 |
| BP | protein ubiquitination             | GO:0016567 | 9 | 0.04870786 | 1.82090597 |

---
